# Supplementary material
Source: publisher figshare collection journal article supplement (https://frontiersin.figshare.com/ndownloader/files/39650191)
Supplement: Supplementary file 1 [file 39650191]

Supplementary Material

A Content Validity and Cognitive Interview to Develop the HARMONI Items: Instrument Measuring Student Well-being in West Java Indonesia

**Hery Susanto1, Miryam Wedyaswari1, Karolina Lamtiur Dalimunthe1***

1Center of Psychological Innovation and Research, Faculty of Psychology,
Universitas Padjadjaran, Sumedang, Indonesia

*** Correspondence:**Karolina Lamtiur Dalimunthe
[karolina@unpad.ac.id](mailto:karolina@unpad.ac.id)

Table S3

Examples of good items

| Dimension | Item | |
| --- | --- | --- |
| English translation | Original wording (Bahasa Indonesia) |
| Positivity | I feel comfortable doing various school activities. | *Saya merasa nyaman melakukan berbagai kegiatan sekolah.* |
| Relationships | My school friends care about me. | *Teman-teman sekolah peduli kepada saya* |
| Outcomes | In general, I am satisfied with what I have achieved in school. | *Secara umum saya puas dengan apa yang saya capai selama bersekolah.* |
| Strengths | I am proud of myself. | *Saya bangga kepada diri saya.* |
| Purpose | I enjoy being involved in activities aimed at helping others. | *Saya senang terlibat dalam kegiatan yang ditujukan untuk membantu orang lain.* |
| Engagement | I ask about material that I do not understand. | *Saya bertanya mengenai materi yang tidak saya pahami.* |
| Resilience | I am always persistent in facing all the challenges that occur during school. | *Saya selalu gigih dalam menghadapi segala tantangan yang terjadi selama bersekolah.* |
